# Supplementary material for: Identification of Euglena gracilis β-1,3-glucan phosphorylase and establishment of a new glycoside hydrolase (GH) family GH149
Source: PubMed Central journal article supplement (PMC5827456; doi:10.1074/jbc.ra117.000936), 2018-01-09
Supplement: supp_RA117.000936_133879_1_supp_40417_p1cx9m.pdf [file supp_RA117.000936_133879_1_supp_40417_p1cx9m.pdf]

## Supplemental Data

Identification of *Euglena gracilis*  $\beta$ -1,3-glucan phosphorylase and establishment of a new glycoside hydrolase (GH) family GH149

**Sakonwan Kuhadomlarp<sup>a</sup>, Nicola J. Patron<sup>b</sup>, Bernard Henrissat<sup>c,d,e</sup>, Martin Rejzek<sup>a</sup>, Gerhard Saalbach<sup>a</sup> & Robert A. Field<sup>a,1</sup>**

<sup>a</sup>Department of Biological Chemistry, John Innes Centre, Norwich Research Park, Norwich NR4 7UH, UK.

<sup>b</sup>Earlham Institute, Norwich Research Park, Norwich, NR4 7UZ, UK. <sup>c</sup>Aix-Marseille University, Architecture et Fonction des Macromolécules Biologiques, 163 Avenue de Luminy, 13288 Marseille, France. <sup>d</sup>Centre National de la Recherche Scientifique, UMR 7257, 163 Avenue de Luminy, 13288 Marseille, France. <sup>e</sup>Department of Biological Sciences, King Abdulaziz University, Jeddah, Saudi Arabia.

**Running title:** New  $\beta$ -1,3-glucan phosphorylase family

<sup>1</sup>To whom correspondence should be addressed: Robert A. Field: Department of Biological Chemistry, John Innes Centre, Norwich Research Park, Norwich NR4 7UH, UK. [rob.field@jic.ac.uk](mailto:rob.field@jic.ac.uk).

**Supplemental Table S1.** Characterized GH94 sequences that were used for BLAST analysis with EgP1 and Pro\_7066

| <b>Sequence names*</b>                                               | <b>Genbank accession</b> |
|----------------------------------------------------------------------|--------------------------|
| CBP from <i>Cellvibrio gilvus</i> ATCC 13127                         | BAA28631.1               |
| ChBP from <i>Vibrio proteolyticus</i>                                | BAC87867.1               |
| CBP from <i>Cellulomonas uda</i>                                     | AAQ20920.1               |
| CBP from <i>Ruminiclostridium thermocellum</i>                       | AAL67138.1               |
| CBP from <i>Saccharophagus degradans</i>                             | ABD80168.1               |
| CDP from <i>Ruminiclostridium thermocellum</i>                       | BAB71818.1               |
| LBP from <i>Halorhabdus tiamatea</i> .                               | WP_020936056.1           |
| CBP from <i>Clostridium stercorarium</i>                             | AAC45510.0               |
| CDP from <i>Clostridium stercorarium</i>                             | AAC45511.1               |
| CBP from <i>Cellvibrio gilvus</i> ATCC 13127                         | BAA28631.1               |
| CBP from <i>Thermotoga maritima</i> MSB8                             | AAD36910.1               |
| CBP from <i>Thermotoga neapolitana</i>                               | AAB95491.2               |
| N,N'-diacetylchitobiose phosphorylase from <i>Vibrio furnissii</i>   | AAG23740.1               |
| ChBP from <i>Vibrio proteolyticus</i>                                | BAC87867.1               |
| LBP from <i>Acholeplasma laidlawii</i> PG-8A                         | ABX81345.1               |
| LBP from <i>Paenibacillus</i> sp. YM1                                | BAJ10826.1               |
| N,N'-diacetylchitobiose phosphorylase from <i>Ruminococcus albus</i> | WP_013499018.1           |
| CBP from <i>Halorhabdus tiamatea</i> SARL4B                          | CCQ33375.1               |
| NdvB protein from <i>Neurospora crassa</i> OR74A                     | EAA28929.1               |
| CellAP from <i>Xanthomonas campestris</i>                            | WP_011039146.1           |

\*CBP = cellobiose phosphorylase, ChBP = chitobiose phosphorylase, CDP = cellodextrin phosphorylase, LBP = laminaribiose phosphorylase, CellAP = cellobionic acid phosphorylase

**Supplemental Table S2.** Summary of the observed  $[M+Na]^+$  of glucans in MALDI-ToF analysis.

| <b>DP of glucan</b> | <b>Calculated<br/>[M+Na]<sup>+</sup></b> | <b>The closest<br/>observed [M+Na]<sup>+</sup></b> |
|---------------------|------------------------------------------|----------------------------------------------------|
| G4                  | 689.221                                  | 689.203                                            |
| G5                  | 851.274                                  | 851.223                                            |
| G6                  | 1013.326                                 | 1013.287                                           |
| G7                  | 1175.379                                 | 1175.330                                           |
| G8                  | 1337.432                                 | 1337.374                                           |
| G9                  | 1499.485                                 | 1499.483                                           |
| G10                 | 1661.538                                 | 1661.517                                           |
| G11                 | 1824.581                                 | 1823.591                                           |
| G12                 | 1986.723                                 | 1985.649                                           |

**Supplemental Table S3.** Summary of conserved amino acid residues that are involved in GH94 catalysis and G1P binding that have been found in the EgP1 and Pro\_7066

| <b>GenBank accession</b> | <b>CAZy families</b> | <b>Catalytic residues</b> | <b>G1P binding (-1 subsite)</b> | <b>Phosphate recognition</b> | <b>References</b>       | <b>PDB structures</b>  |
|--------------------------|----------------------|---------------------------|---------------------------------|------------------------------|-------------------------|------------------------|
| BAA28631.1               | GH94                 | D490                      | W488, R367, D368                | H666                         | (44)                    | 2CQS, 2CQT             |
| BAC87867.1               | GH94                 | D492                      | W490, R349, D350                | H644                         | (45)                    | 1V7V, 1V7W, 1V7X       |
| AAQ20920.1               | GH94                 | D490                      | W488, R367, D368                | H666                         | (46)                    | 3RRS, 3RSY, 3S4A, 3S4B |
| AAL67138.1               | GH94                 | D483                      | W481, R360, D361                | H653                         | (47)                    | 3QDE                   |
| ABD80168.1               | GH94                 | D472                      | W470, R349, (N350)              | H626                         | (48)                    | 4ZLE, 4ZLF, 4ZLG, 4ZLI |
| BAB71818.1               | GH94                 | D624                      | W622, R486                      | H817                         | (19)                    | 5NZ7, 5NZ8             |
| WP_020936056.1           | GH94                 | D535                      | W533, R384, D385                | H749                         | Inferred from Figure S9 | NA                     |
| EgP1 (in this study)     | GH149                | D660                      | W658, R477, D478                | H960                         | Inferred from Figure S9 | NA                     |
| Pro_7066 (in this study) | GH149                | D653                      | W651, R470, D471                | H959                         | Inferred from Figure S9 | NA                     |

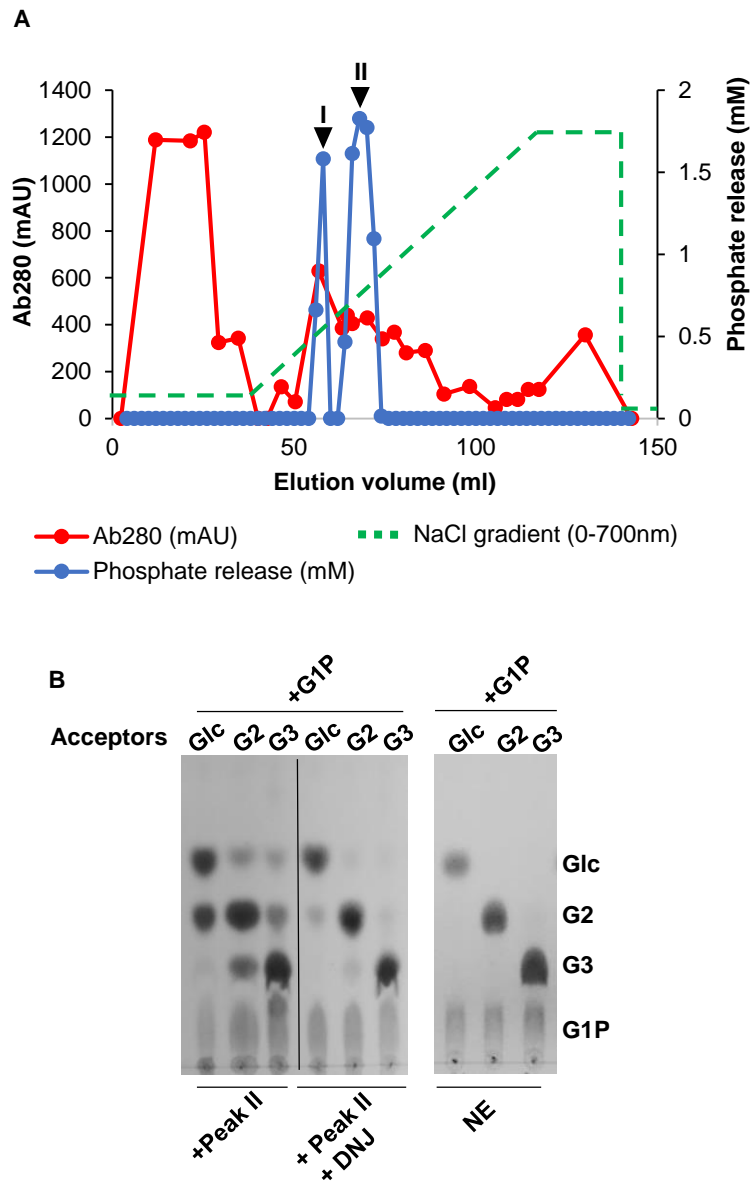

**Fig. S1 Partial purification of *Euglena* phosphorylase from *E. gracilis* protein extract.** (A) An overlay of AIEX elution profile (red) and the amount of phosphate release by the phosphorylase activity in each fraction in the phosphate release assay (blue). (B) TLC analysis of *Euglena* phosphorylase (PeakII) mediated reactions between G1P and laminaribiose (G2), or laminaritriose (G3) as substrates in the presence (+DNJ, 1000  $\mu$ M) and absence of DNJ. NE = no enzyme control.

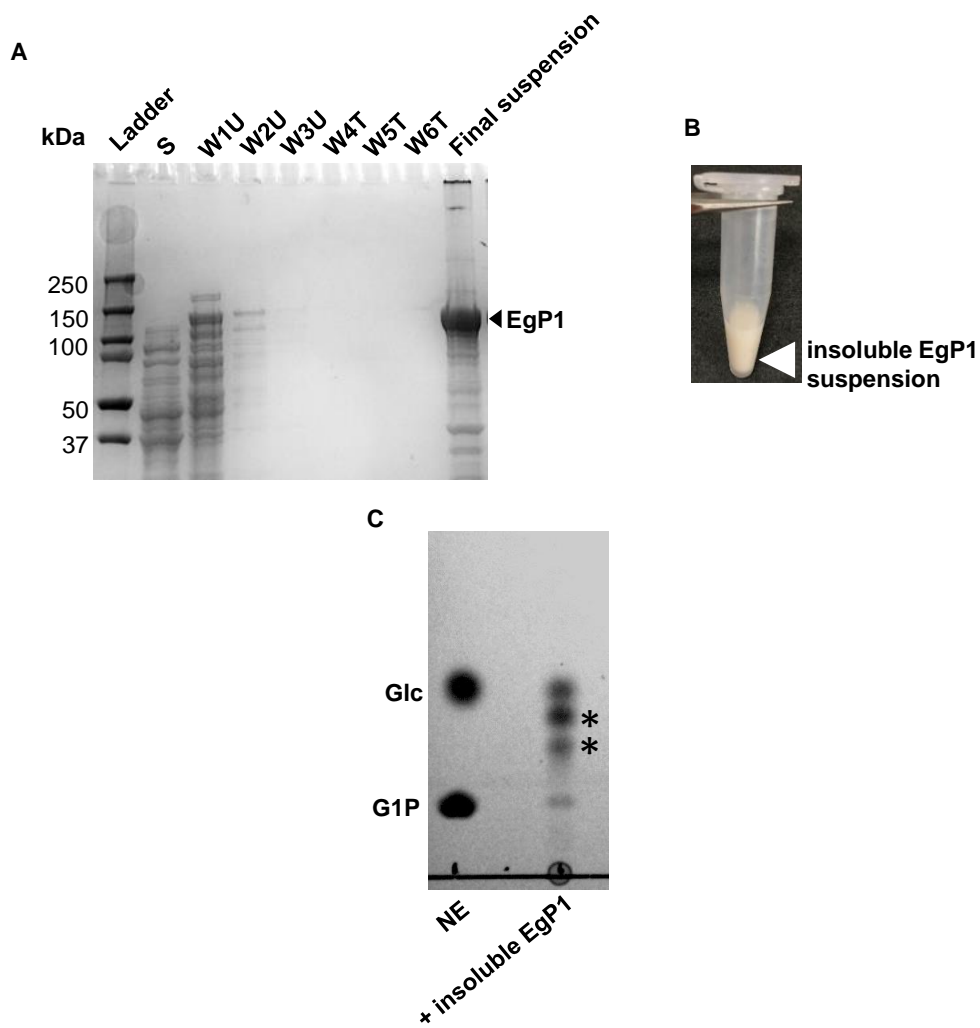

**Fig. S2 Expression and characterization of insoluble recombinant EgP1.** (A) SDS-PAGE analysis of insoluble EgP1 after purification by washing with 50 mM Tris-HCl pH 7.5 containing 6 M urea (W1U-W3U) followed by washing with buffer alone (W4T-W6T, 50 mM Tris-HCl pH 7.5). (B) the final suspension of insoluble EgP1 in 50 mM Tris-HCl pH 7.5 buffer. (C) TLC analysis of the reverse phosphorolysis reaction carried out by the insoluble EgP1 with 10 mM Glc and 20 mM G1P. \* = oligosaccharide products from the reverse phosphorolysis reaction.

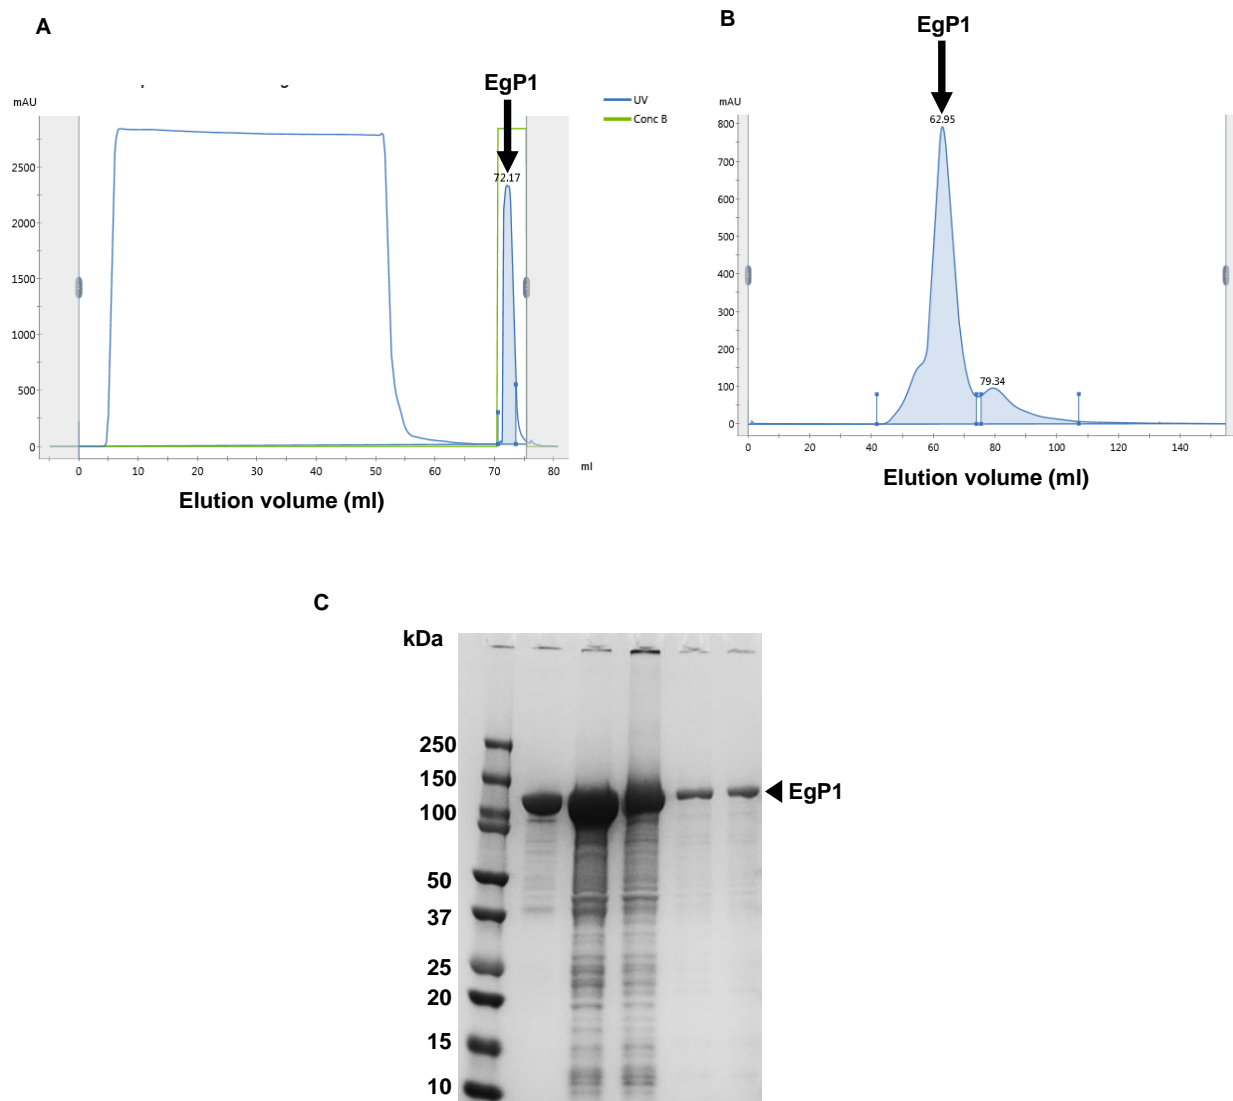

**Fig. S3 IMAC and gel filtration purification of recombinant EgP1.** (A) IMAC purification with UV detection (blue line). EgP1 was eluted in 100% of 10 mM HEPES pH 7.5, 250 mM NaCl, 500 mM imidazole (green line)). (B) Gel filtration of EgP1. The protein was eluted at 63 ml elution volume in 20 mM HEPES pH 7.5, 150 mM NaCl. (C) SDS-PAGE of EgP1 after IMAC purification.

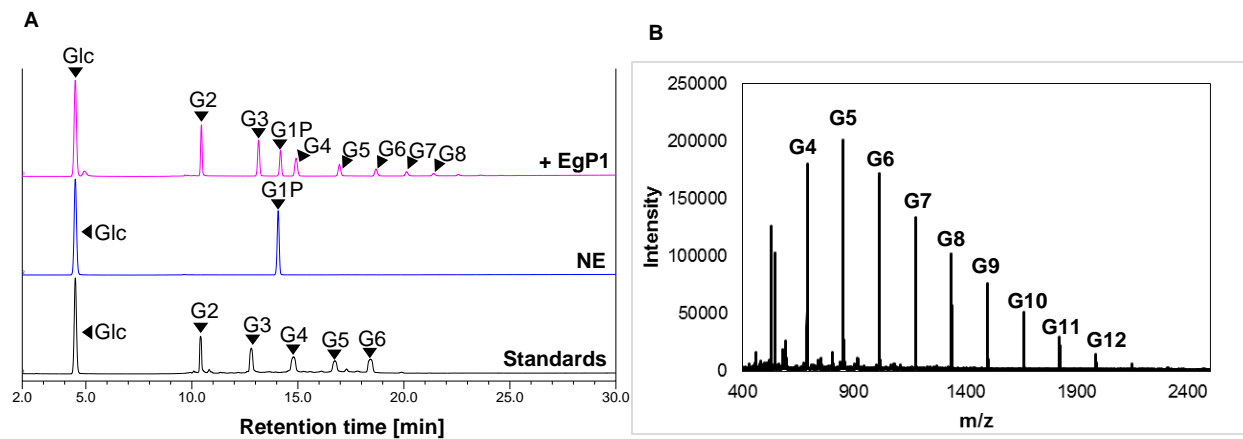

**Fig. S4 Reverse phosphorolysis reaction catalyzed by EgP1.** (A) HPAEC-PAD analysis of the reverse phosphorolysis carried out by EgP1 in the presence of Glc and G1P as substrates. (B) MALDI-ToF analysis after 1 hour.



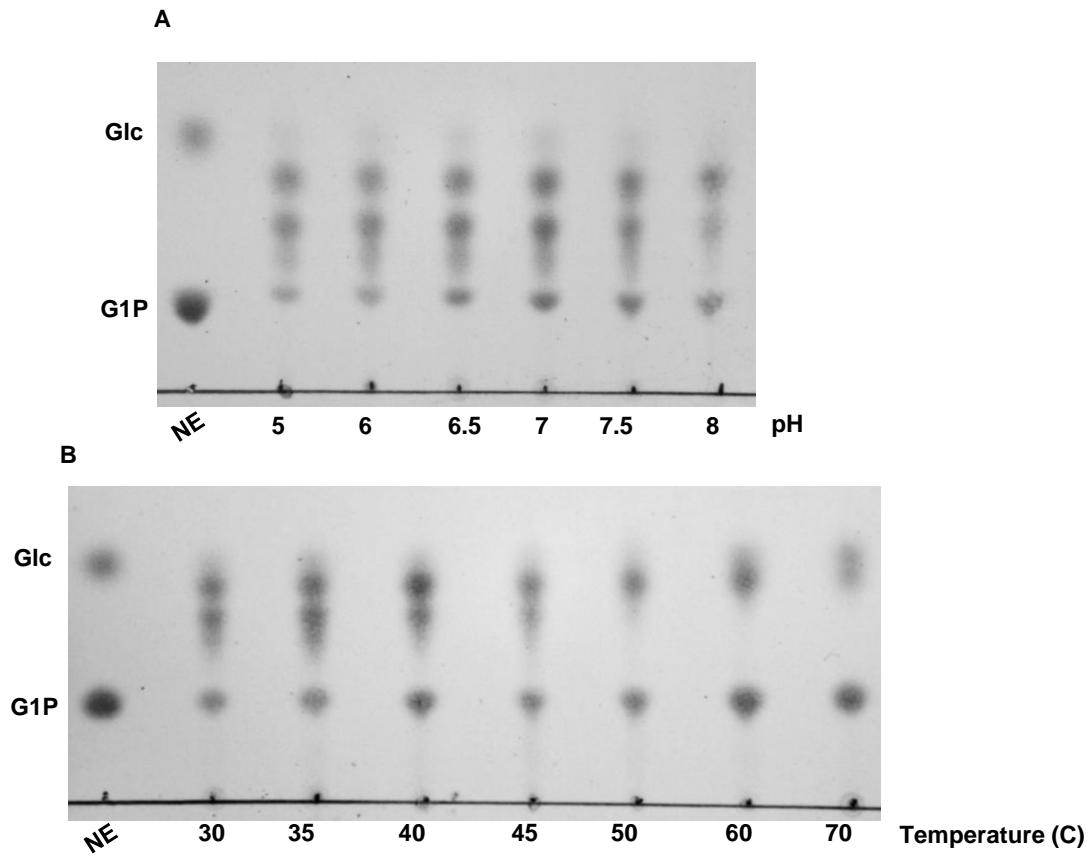

**Fig. S5** TLC analysis of the reverse phosphorolysis carried out by EgP1 over a range of pH (A) at 30 °C or a range of temperatures (B) at pH 7.0.

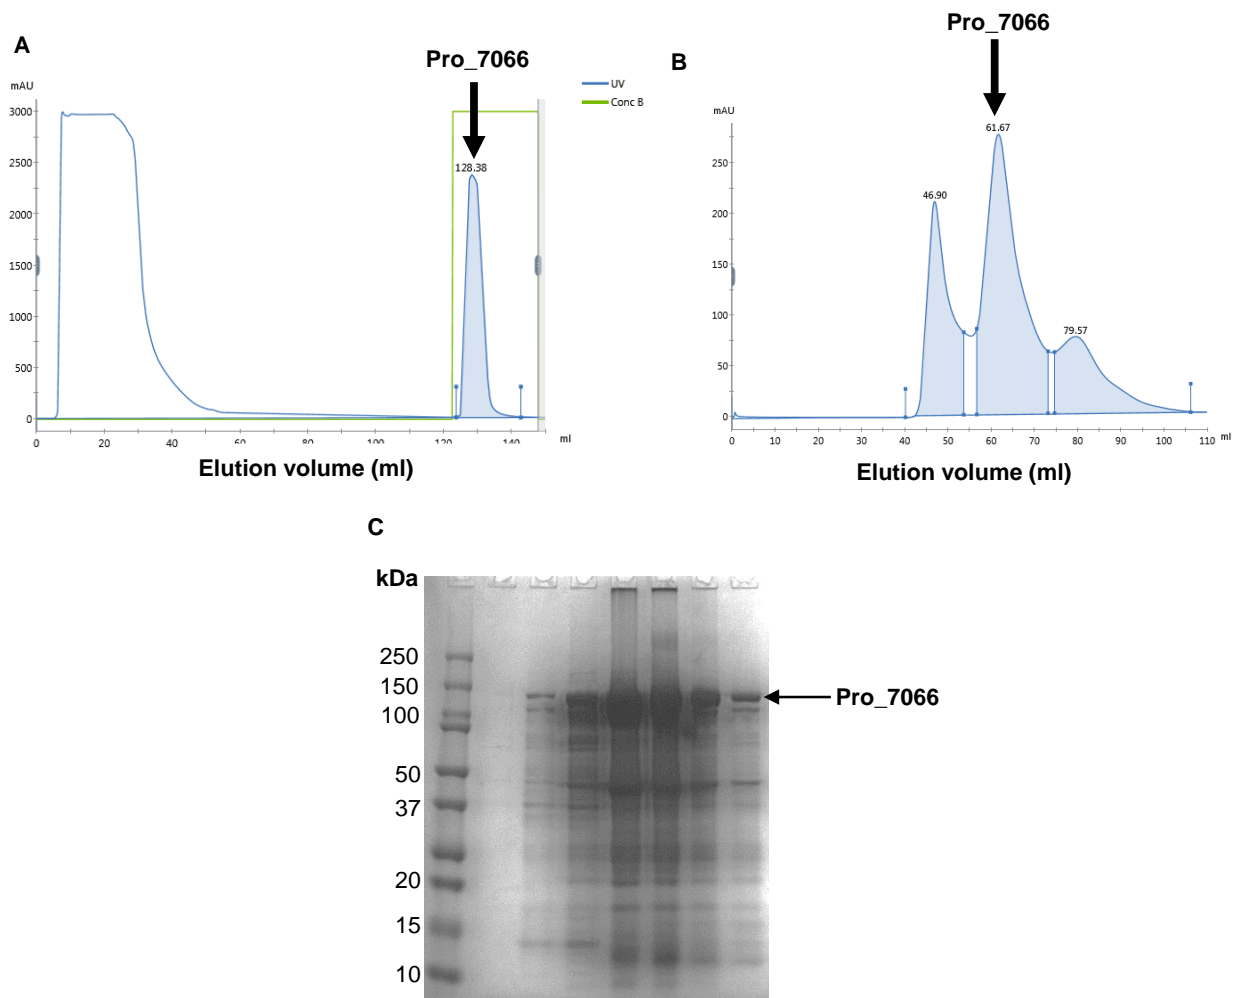

**Fig. S6 IMAC and GF purification of recombinant Pro\_7066.** (A) IMAC purification with UV detection. Pro\_7066 was eluted in 100% of 10 mM HEPES pH 7.5, 250 mM NaCl, 500 mM imidazole. (B) Gel filtration of Pro\_7066. The protein was eluted at 63 ml elution volume in 20 mM HEPES pH 7.5, 150 mM NaCl. (C) SDS-PAGE of Pro\_7066 after IMAC purification.

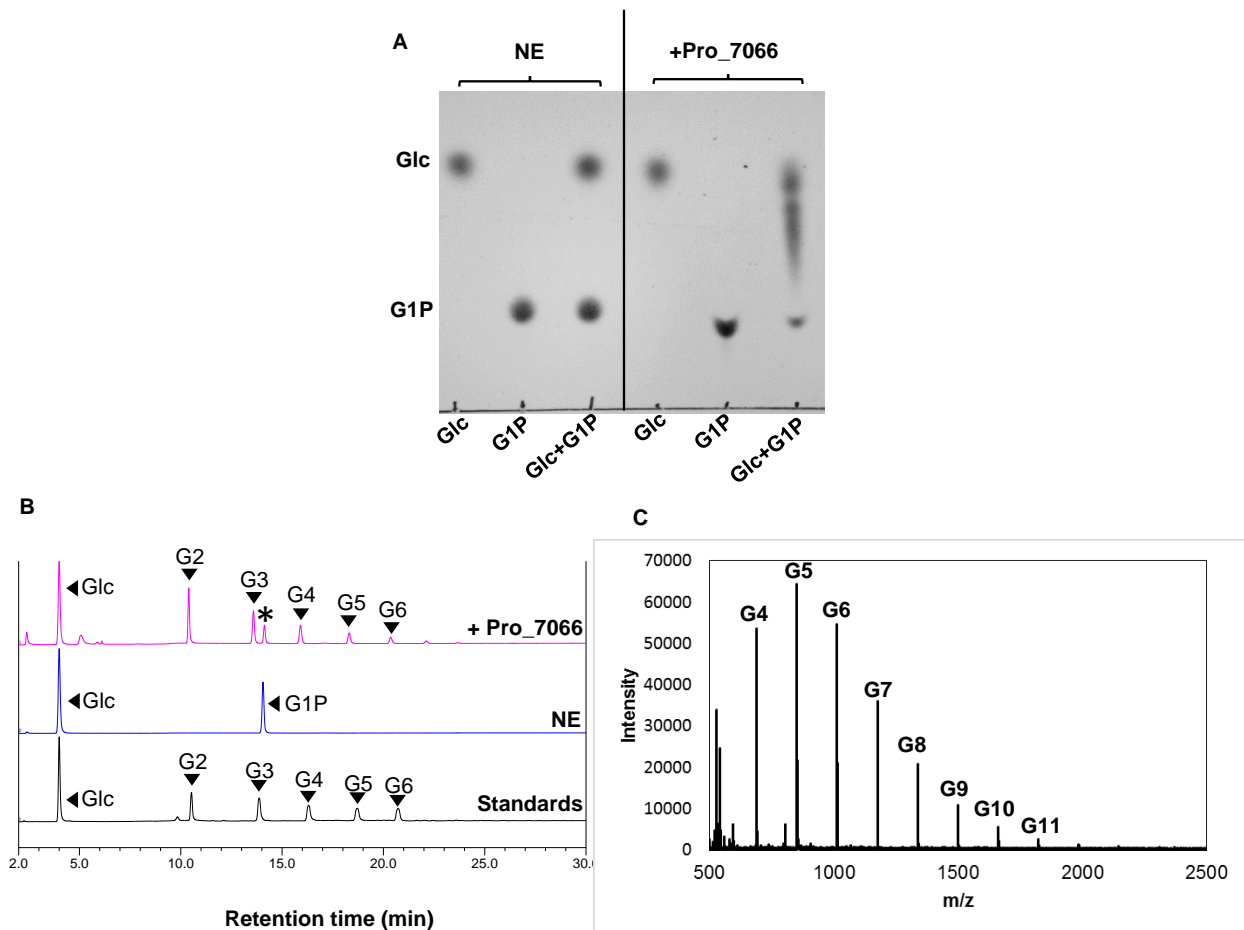

**Fig. S7. Reverse phosphorolysis reaction catalyzed by Pro\_7066** (A) TLC analysis of the reverse phosphorolysis carried out by Pro\_7066. (B) HPAEC-PAD analysis of the reaction. (C) MALDI-ToF analysis of the reverse phosphorolysis after 1 hr. Asterisk = G1P.

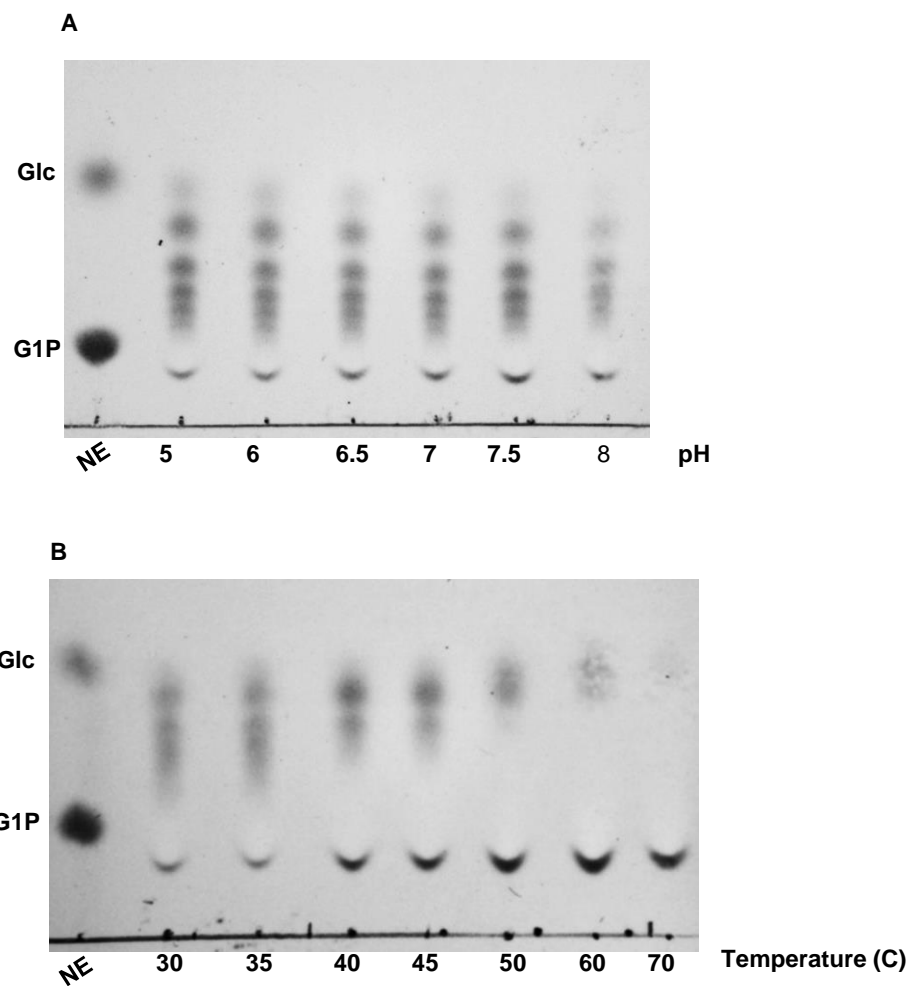

**Fig. S8** TLC analysis of the reverse phosphorolysis carried out by Pro\_7066 (A) over a range of pH at 30 °C or a range of temperatures (B) at pH 7.0.

|             |                                                                                                                          |                                                                                    |      |
|-------------|--------------------------------------------------------------------------------------------------------------------------|------------------------------------------------------------------------------------|------|
| EgP1        | 437 EYLPITFSRRHGDPSPRPWNTFSICLRD-EAGNKV                                                                                  | .....LGYQGNWRDIFGNWEALCMSYFNFLPSMI                                                 | 498  |
| Pro_7066    | 429 EYLPKFSRRHGDPSPRPWNTFSINTQSEIDGSKV                                                                                   | .....LDYEGNWRDIFGNWEALAHSPFNFDGMI                                                  | 491  |
| EgP2        | 437 EYLPITFSRRHGDPSPRPWNTFSICLRD-AAGNKV                                                                                  | .....LGYQGNWRDIFGNWEALTIISFYFYESII                                                 | 498  |
| EgP3        | 437 EYLPITFSRRHGDPSPRPWNTFSICLRD-AAGNKV                                                                                  | .....LGYQGNWRDIFGNWEALTIISFYFYESII                                                 | 498  |
| EgP4        | 437 EYLPITFSRRHGDPSPRPWNTFSICLRD-AAGNKV                                                                                  | .....LGYQGNWRDIFGNWEALCMSYFNFLPSMI                                                 | 498  |
| GH94-CgCBP  | 270 LENPDEEKWADDAHQVVKAPAHALLGRFATSEQVDAAL EALNSYWTLLSTYSVSSDEKLRDMVNIWNQYQCMVTFNMSRSASFETGIGRGMGFRDSNDLLGFVHLIPERARERI  | 388                                                                                |      |
| GH94-CuCBP  | 270 VKNPDEEKWADDAKQVVKRAHALLSRFATSEQVDAAL KSDYWTLLSTYSVSSDEKLRDMVNIWNQYQCMVTFNMSRSASFETGIGRGMGFRDSNDLLGFVHLIPERARERI     | 388                                                                                |      |
| GH94-RICBP  | 266 VENKDEKWEKSG--VINKKAYEMIEQFNITVEKVDKAFELKSYWNALLSKYFL ESHDEKLRDMVNIWNQYQCMVTFNMSRSASFETGIGRGMGFRDSNDLLGFVHLIPERARERI | 381                                                                                |      |
| GH94-VpChBP | 269 GKGN-----GRLREHYQDVANI DAAFAAIKAWHDERKAKFOVKS PNOGLDTMI NAWTL YQAEITCVWBSRFA SFI EYVGRTGLGYKDTAEADIASVPHANREMTKRRI   | 370                                                                                |      |
| GH94-HLBP   | 302 WTDDP-----DPATLVERYGSSAEVAEELAAQQDHREKSAVEFDTGDDTFDQWM--RWTLQPVFRRLFGNSFLPHYDYGRRGRWRDLWDQDILSLLLETEDNVTLLD          | 404                                                                                |      |
| GH94-SaCBP  | 275 AFDES-----EAILRNKYL SAEGFAKAKSEYQYITSGKGLQINTPDELNFFVNHVLPQVYFYGQVNR-----LTTDPQTRYIIDNMGMSYIKRINIRQAF                | 370                                                                                |      |
| EgP1        | 499 AKFVNATTADGYNPYRYSN-----DGIDWETVEPHDPWSYIGYWG                                                                        | HQIYVLLRFL ESLRRFDPSALEELHHEEIFYANVPPYIIRPYNEIVKPNKDTIVFAHTRHADL                   | 602  |
| Pro_7066    | 492 HKFLNATTFDYNPYRYSN-----DGFDWEVIEEDPWSYIGYWG                                                                          | HQIYVLLRFL EIEKHPGKLSHYFSECFYAAVPPYIKPYVEILNAPKDTIIGNHEWEKVI                       | 595  |
| EgP2        | 499 AKFVNASTVDGYNPYIVNRT-----DGINWCEPDPHPHANIIGYWG                                                                       | HQIYVLLKLEWCCKGFKPKLEANCDFWFSYANVPEIRPYDKIVENAKDTIFENWKKHKHI                       | 603  |
| EgP3        | 499 AKFVNASTVDGYNPYIVNRT-----DGINWCEPDPHPHANIIGYWG                                                                       | HQIYVLLKLEWCCKGFKPKLEANCDFWFSYANVPEIRPYDKIVENAKDTIFENWKKHKHI                       | 603  |
| EgP4        | 499 AKFVNATTADGYNPYRYSN-----DGIDWETVEPHDPWSYIGYWG                                                                        | HQIYVLLRFL ESLRRFDPSALEELHHEEIFYANVPPYIIRPYNEIVKPNKDTIVFAHTRHADL                   | 602  |
| GH94-CgCBP  | 389 IDIASTQFADGSAHYHQYQP-----LTKRGNNDIGSGFN                                                                              | DPLWL IAGVAA YIKESGDW-----GILDEVPFDNEP-----                                        | 454  |
| GH94-CuCBP  | 389 IDIASTQFADGSAHYHQYQP-----LTKRGNNDIGSGFN                                                                              | DPLWL IAGTAA YIKETGDF-----SILDEVPFDNEP-----                                        | 454  |
| GH94-RICBP  | 382 LDLAATQL EDDSAHYHQYQP-----LTKKGNNEIGSNF                                                                              | DPLWL IATAA YIKETGDF-----SILKEQVFNNDP-----                                         | 447  |
| GH94-VpChBP | 371 VDLLRGQVKAGYGLHLFPDWFDPKEDEVAPSKSPVPTSPSDEKIHGIKDTCSS                                                                | DHHLW IPTIKCYVMETGET-----SFFDQMI PYAD-----                                         | 456  |
| GH94-HLBP   | 405 YNNFAGVRFSSNATIIGDEP-----GEFTADRNIPRVVM                                                                              | HQAWPLW TTRFYLDLSDGL-----GLFLRDQQYKLDHVDRASEQD                                     | 482  |
| GH94-SaCBP  | 371 LHALSQEESGAMPDGLILL-----EGAEGLINQIPT                                                                                 | HCVWL PVMQAYLDETNDY-----ALLDEIVPYASG-----                                          | 436  |
| EgP1        | 603 MALAKTMGSDGKLLLDGHGKVLRVNLVEKLLVSL LAKLSNFVL DGGIWLNTORPE                                                            | INANNALVGN-----GISMVTFHLRRLWTFVIAELQAIKG-ETKLS                                     | 699  |
| Pro_7066    | 596 NERKKSIGADGALKSNKDSIYHYNFIEKILATVLAKMSNFIPEAGIWLNTORPE                                                               | INANNALVGN-----GISMVTFHLRRLWTFVIAELQAIKG-ETKLS                                     | 699  |
| EgP2        | 604 EALKKTMGADAKLVLTKDGKVVHVNLAEKLLVPLMAKSNFVIGGGIWLNTORPE                                                               | INANNALVGN-----GLSMVTLYVMRYSVFLDLAKLSLPTPTVNI                                      | 701  |
| EgP3        | 604 EALKKTMGADAKLVLTKDGKVVHVNLAEKLLVPLMAKSNFVIGGGIWLNTORPE                                                               | INANNALVGN-----GLSMVTLYVMRYSVFLDLAKLSLPTPTVNI                                      | 701  |
| EgP4        | 604 EALKKTMGADAKLVLTKDGKVVHVNLAEKLLVPLMAKSNFVIGGGIWLNTORPE                                                               | INANNALVGN-----GISMVTFHLRRLWTFVIAELQAIKG-ETKLS                                     | 699  |
| GH94-CgCBP  | 455-----GSEVPLFEHLTRSFQFVQNR--GPHGLPLIGRAD                                                                               | INCLNCFSTTGPESFOTTE NQAQGVAAE SFI AAFVLYGEGY AEL AARRGL ADVADRGS                   | 550  |
| GH94-CuCBP  | 456-----GSEVPLFEHLTRSFQFVQNR--GPHGLPLIGRAD                                                                               | INCLNCFSTTGPESFOTTE NQAQGVAAE SFI AAFVLYGEGY AEL AARRGL ADVADRGS                   | 550  |
| GH94-RICBP  | 448-----SKADTFMEHLTRSFYHVVNLR--GPHGLPLIGRAD                                                                              | INCLNCFSTTGPESFOTTE NQAQGVAAE SFI AAFVLYGEGY AEL AARRGL ADVADRGS                   | 550  |
| GH94-VpChBP | 457-----GGEASVYEHMAKALDFAEYV--GOTGICKGLRAD                                                                               | INCLNCFSTTGPESFOTTE NQAQGVAAE SFI AAFVLYGEGY AEL AARRGL ADVADRGS                   | 550  |
| GH94-HLBP   | 483-----EAWSPEDGTELYTDDGEIYEGTVL EHLVQHLTQFFNV--GENHVMRL EADN                                                            | INAMDMAPPER-----GESVAF TALYWNLRDMSVDLADLVEEIEIA                                    | 579  |
| GH94-SaCBP  | 437-----EKRETYEQHMHAMRWLQAR--DERGLSFIAGDD                                                                                | ICPMMVMYGVK-----GKGVSGWL SVATAYALNLWADVCEQRQNSCANEFRQ                              | 517  |
| EgP1        | 700 AEVSVWFDGIKKVF AENEGILGGAV--SASORRAML DALGEAASVYRGI                                                                  | LYEKGLSGAKVAVPTASVVEFLQSALKFVDHTIRA-----NKTPEGLYHYSNLLVLPQSGA-DIKHLYL              | 809  |
| Pro_7066    | 694 NEMVEFYHKVRETL MENOHL LAGSI--SDTDRKVIDL                                                                              | KGLNAAADYRFGIYNSGFQWKRKRTSHMOGLKNFVKVSLQFIDHSIRK-----NQRPDGLYHAYNLSMVEKNEKIEAISYLE | 814  |
| EgP2        | 702 EEVAVWL AGLTKVYADNVGLIAGDKDLSHDDRQLDALGVVASEYRWK                                                                     | IYENGFSGQKTAVKVADAVHFLDSLLLFIDYSIRK-----NKTPEGLYHAYNLSLHPGKA-DIGYLYV               | 803  |
| EgP3        | 702 EEVAVWL AGLTKVYADNVGLIAGDKDLSHDDRQLDALGVVASEYRWK                                                                     | IYENGFSGQKTAVKVADAVHFLDSLLLFIDYSIRK-----NKTPEGLYHAYNLSLHPGKA-DIGYLYV               | 803  |
| EgP4        | 700 AEVSVWFDGIKKVF AENEGILGGAV--SASORRAML DALGEAASVYRGI                                                                  | LYEKGLSGAKVAVPTASVVEFLQSALKFVDHTIRA-----NKTPEGLYHYSNLLVLPQSGA-DIKHLYL              | 809  |
| GH94-CgCBP  | 551-----GSEVPLFEHLTRSFQFVQNR--GPHGLPLIGRAD                                                                               | INCLNCFSTTGPESFOTTE NQAQGVAAE SFI AAFVLYGEGY AEL AARRGL ADVADRGS                   | 550  |
| GH94-CuCBP  | 551-----GSEVPLFEHLTRSFQFVQNR--GPHGLPLIGRAD                                                                               | INCLNCFSTTGPESFOTTE NQAQGVAAE SFI AAFVLYGEGY AEL AARRGL ADVADRGS                   | 550  |
| GH94-RICBP  | 544-----GSEVPLFEHLTRSFQFVQNR--GPHGLPLIGRAD                                                                               | INCLNCFSTTGPESFOTTE NQAQGVAAE SFI AAFVLYGEGY AEL AARRGL ADVADRGS                   | 550  |
| GH94-VpChBP | 534-----EAWSPEDGTELYTDDGEIYEGTVL EHLVQHLTQFFNV--GENHVMRL EADN                                                            | INAMDMAPPER-----GESVAF TALYWNLRDMSVDLADLVEEIEIA                                    | 579  |
| GH94-HLBP   | 580 RELQTL LDTLSEPVYDQDPEA-----KQARLD-----DYLDTWERTVSGEKATVA                                                             | IEELAADL EKAWEVLEQLRQDEFIEDEGHQWNGYDSDSRRVGGD-HQGVHRM                              | 679  |
| GH94-SaCBP  | 518-----EKRETYEQHMHAMRWLQAR--DERGLSFIAGDD                                                                                | ICPMMVMYGVK-----GKGVSGWL SVATAYALNLWADVCEQRQNSCANEFRQ                              | 517  |
| EgP1        | 810 MLEGQVCA LSSGLITGQE-----AVEMLRHLRGSAL                                                                                | YRADOOSYTLVPDREVPKFLARNVIPAPRLALPGLKFVLDHGL-QSIAAYVDAEGVGRFGDTLSNADDLLAALDKLQDS--  | 917  |
| Pro_7066    | 805 MLEGQVAVLSSGFLSSKE-----NLAVLDGLKNSAL                                                                                 | YRADOOSYTLVPDREVPKFLARNVIPAPRLALPGLKFVLDHGL-QSIAAYVDAEGVGRFGDTLSNADDLLAALDKLQDS--  | 917  |
| EgP2        | 814 MLEGQASALSSGLITSDS-----AAALFNHIYSSD                                                                                  | YRADOOSYTLVPDREVPKFLARNVIPAPRLALPGLKFVLDHGL-QSIAAYVDAEGVGRFGDTLSNADDLLAALDKLQDS--  | 917  |
| EgP3        | 814 MLEGQASALSSGLITSDS-----AAALFNHIYSSD                                                                                  | YRADOOSYTLVPDREVPKFLARNVIPAPRLALPGLKFVLDHGL-QSIAAYVDAEGVGRFGDTLSNADDLLAALDKLQDS--  | 917  |
| EgP4        | 810 MLEGQVCA LSSGLITGQE-----AVEMLRHLRGSAL                                                                                | YRADOOSYTLVPDREVPKFLARNVIPAPRLALPGLKFVLDHGL-QSIAAYVDAEGVGRFGDTLSNADDLLAALDKLQDS--  | 917  |
| GH94-CgCBP  | 591 WIEPQGFVMAAGIYEGEGPDDADAPAKALD-SVNEML                                                                                | ATDHGM-VLQPYATTYGQ-----KALKALD-SVKKYDTPYGL-VLQNPAFTRYI                             | 645  |
| GH94-CuCBP  | 591 WIEPQGFVMAAGIYEGEGPDDADAPAKALD-SVNEML                                                                                | ATDHGM-VLQPYATTYGQ-----KALKALD-SVKKYDTPYGL-VLQNPAFTRYI                             | 645  |
| GH94-RICBP  | 584 FIESQGFVMAEIGLEDG-----KALKALD-SVKKYDTPYGL                                                                            | -VLQNPAFTRYI-----KALKALD-SVKKYDTPYGL-VLQNPAFTRYI                                   | 645  |
| GH94-VpChBP | 576 HESNTLAVLSGLASQER-----GEGAMD-AVDEH                                                                                   | LFSPYGL-HLNAFSPSTPN-----GEGAMD-AVDEHLFSPYGL-HLNAFSPSTPN                            | 623  |
| GH94-HLBP   | 680 TITGQVFTL MGVATDQD-----ADAIVE-AADEY                                                                                  | YEPKMGYRLNTDFELKT-----ADAIVE-AADEY YEPKMGYRLNTDFELKT                               | 728  |
| GH94-SaCBP  | 558 FLNQPSWAL LGGADEGK-----IPCLLD-AVEQQL                                                                                 | ETPYGV-MMLAPAFATMRD-----IPCLLD-AVEQQLETPYGV-MMLAPAFATMRD                           | 605  |
| EgP1        | 918 HPGVDAHRAEL AETFEAVFDHKAFGRSGTMSYEG                                                                                  | LGSCIYWMVSKVLLAAQELTALDRLR--DGSMAALRAAYELRGGIG-FNKAPQYEGAFPSDPYS-----HTPKHA        | 1021 |
| Pro_7066    | 917 KDLVAKESKTEVLI FIEDVFNHAFGRSGTMSYEG                                                                                  | LGSCIYWMVSKVLLAAQELTALDRLR--DGSMAALRAAYELRGGIG-FNKAPQYEGAFPSDPYS-----HTPKHA        | 1021 |
| EgP2        | 920 NPSVDHTAELLDIYEEVFVHRAFGRSGTMSYEG                                                                                    | LGSCIYWMVSKVLLAAQELTALDRLR--DGSMAALRAAYELRGGIG-FNKAPQYEGAFPSDPYS-----HTPKHA        | 1021 |
| EgP3        | 920 NPSVDHTAELLDIYEEVFVHRAFGRSGTMSYEG                                                                                    | LGSCIYWMVSKVLLAAQELTALDRLR--DGSMAALRAAYELRGGIG-FNKAPQYEGAFPSDPYS-----HTPKHA        | 1021 |
| EgP4        | 918 HPGVDAHRAEL AETFEAVFDHKAFGRSGTMSYEG                                                                                  | LGSCIYWMVSKVLLAAQELTALDRLR--DGSMAALRAAYELRGGIG-FNKAPQYEGAFPSDPYS-----HTPKHA        | 1021 |
| GH94-CgCBP  | 646-----ELGEVSTYPPGYKENG                                                                                                 | GIFCHNNPWVI I AETVVGRRG-----ELGEVSTYPPGYKENG                                       | 646  |
| GH94-CuCBP  | 646-----ELGEVSTYPPGYKENG                                                                                                 | GIFCHNNPWVI I AETVVGRRG-----ELGEVSTYPPGYKENG                                       | 646  |
| GH94-RICBP  | 633-----EYGEISTYPPGYKENG                                                                                                 | GIFCHNNPWVI I AETVVGRRG-----EYGEISTYPPGYKENG                                       | 633  |
| GH94-VpChBP | 624-----DIGFVTRVYQGVKENG                                                                                                 | AI FSNPWMAWAEKLRGQD-----DIGFVTRVYQGVKENG                                           | 624  |
| GH94-HLBP   | 729-----DLGRGFGFAFGKENG                                                                                                  | AMFSMAVMYANALYRQKVE-----DLGRGFGFAFGKENG                                            | 729  |
| GH94-SaCBP  | 606-----DLGRVTKQFPGSAENG                                                                                                 | SNYNNAAVFI FLSLISEGE-----DLGRVTKQFPGSAENG                                          | 606  |

**Fig. S9 Multiple alignment of EgP1-4, and Pro\_7066 and GH94 enzymes revealed conservation of key amino acids required for the phosphorylase activity.** Only a snap shot of the alignment is presented showing key amino acid residues. 100% conserved amino acid residues are highlighted in dark blue. Red circles indicated the residues involved in the subsite formation for sugar and sugar phosphate binding. Red triangle represents the residue involved in phosphate binding. Red asterisk represents the Asp catalytic residue.

## **List of supplemental data files**

**Supplemental Data File 1** – List of Euglena proteins identified from affinity proteomics and their predicted functions

**Supplemental Data File 2** – BLAST analyses of GH149 amino acid sequences against EgP1

**Supplemental Data File 3** – GC content analysis of bacterial GH149 DNA sequences

**Supplemental Data File 4** – Sequence IDs for GH149 members
